# Supplementary material
Source: PubMed Central journal article supplement (PMC7362352)
Supplement: advancesADV2020001772-suppl1.pdf [file advancesADV2020001772-suppl1.pdf]

Supplemental Figure 1. Influence of TFR1 duration for a successful TRF2.

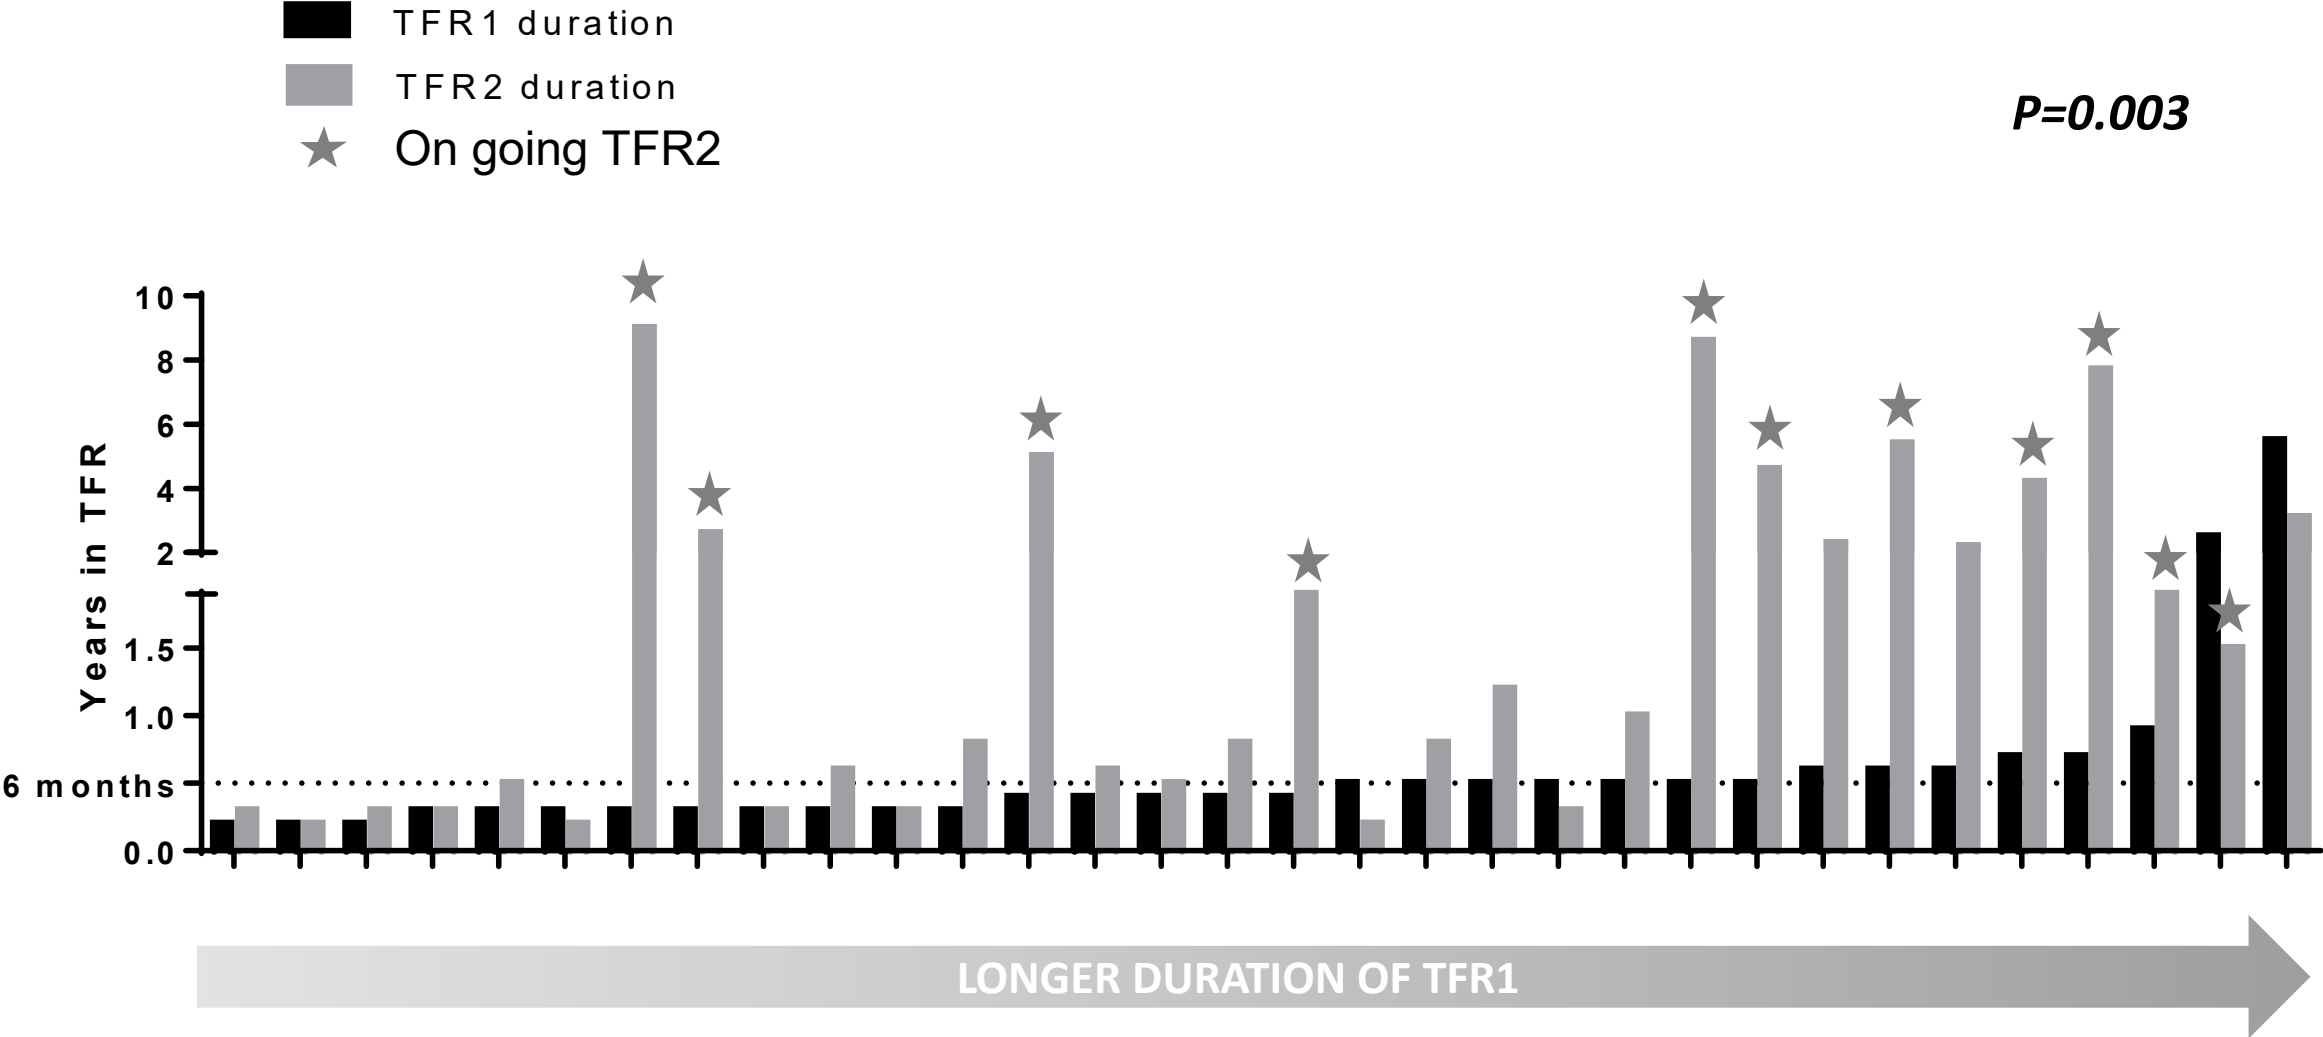

Supplemental Figure 2. TFR2 duration in patients who switched from imatinib (IM) to Second generation tyrosine kinase inhibitors (2G-TKIs) (n=9) after TFR1 as compare to patients who restarted with IM (n=13). Median TFR2 duration was 0.8 years for IM-IM patients and was not reached for IM-2G-TKIs patients.

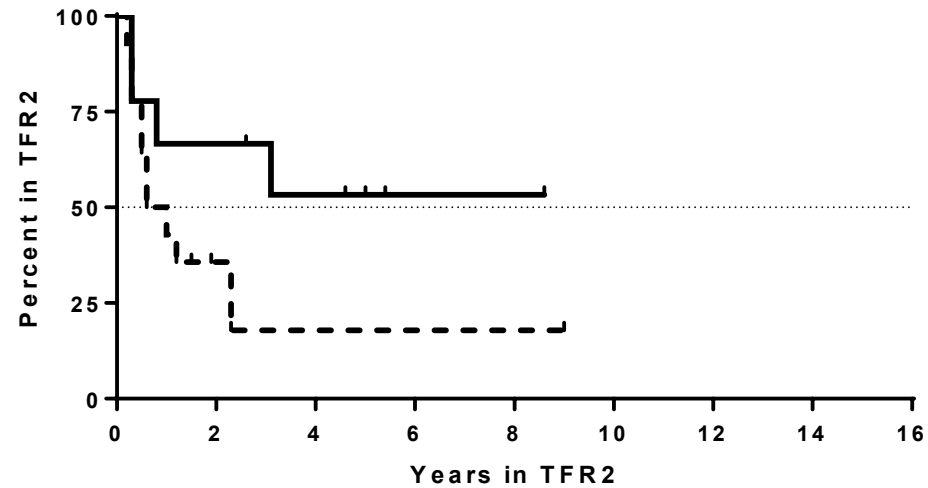

|                  |    |   |   |   |   |       |
|------------------|----|---|---|---|---|-------|
| Patients at risk | 9  | 7 | 5 | 2 | 2 | —     |
|                  | 13 | 4 | 2 | 2 | 2 | - - - |
